# Supplementary material
Source: PubMed Central journal article supplement (PMC5520041)

Supplementary Figure S2

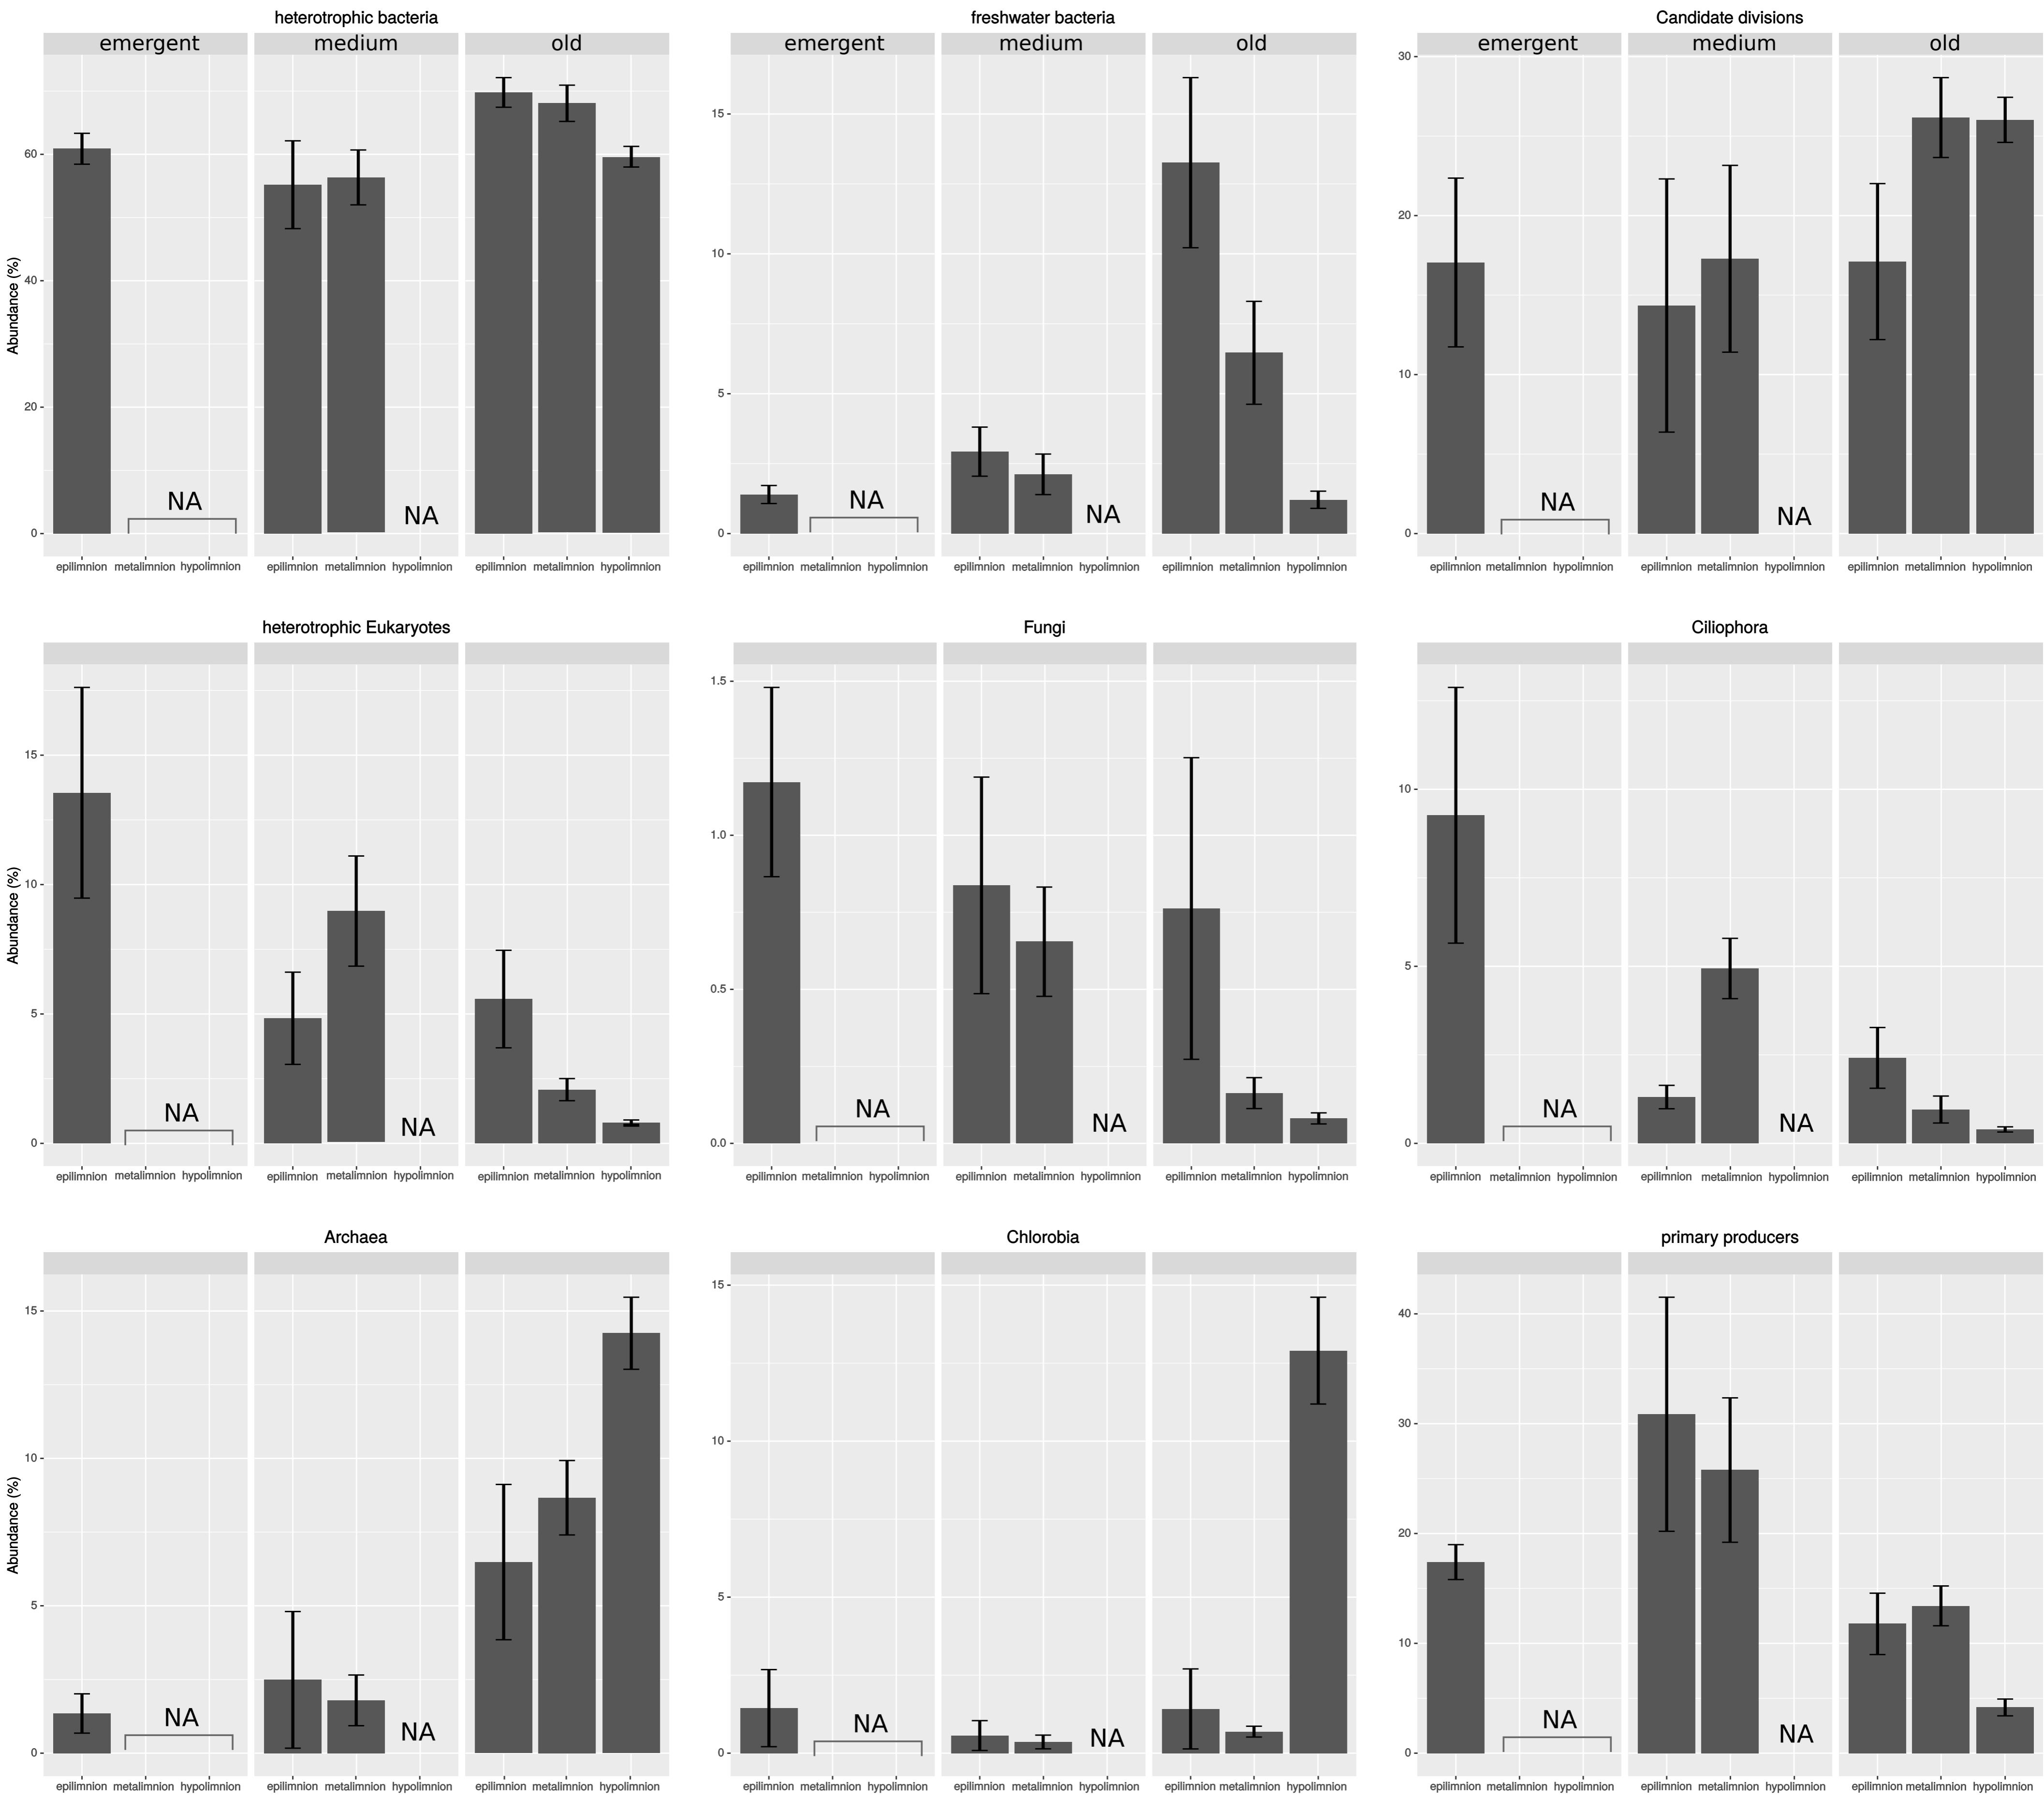

Supplement: ismej201754x5.pdf [file ismej201754x5.pdf]
